# Supplementary material for: Induction of N-Ras degradation by flunarizine-mediated autophagy
Source: PubMed Central journal article supplement (PMC6240051; doi:10.1038/s41598-018-35237-2), 2018-11-16

## **Supplemental information**

### **Induction of N-Ras degradation by flunarizine-mediated autophagy**

Running title: Degrading N-Ras as a cancer therapy

Ze-Yi Zheng, Jing Li, Fuhai Li, Yanqiao Zhu, Kemi Cui, Stephen T. Wong, Eric C. Chang, and Yi-Hua  
Liao

## Full length gels used in the main figures

**Fig. 1B**

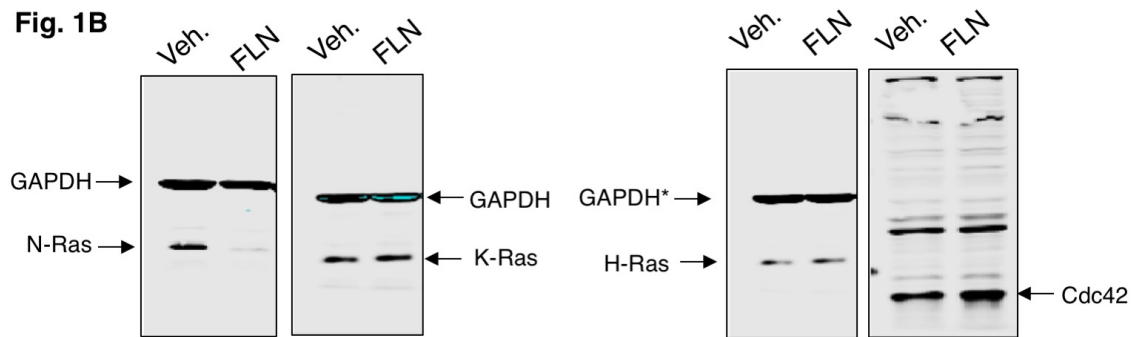

**Fig. 1C**

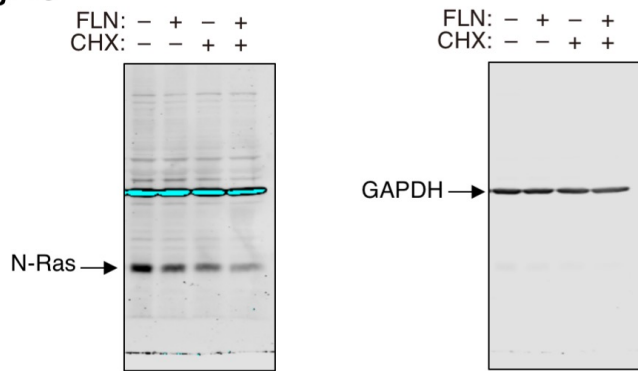

**Fig. 1D**

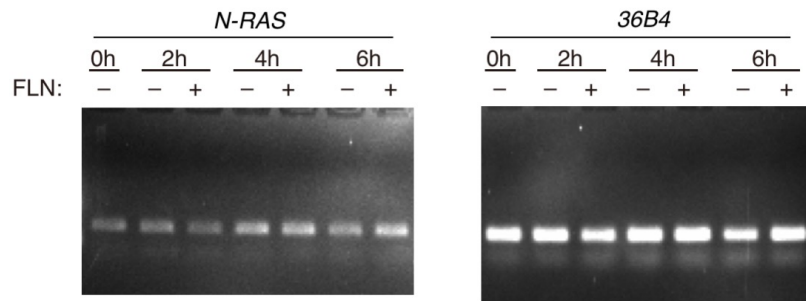

**Fig. 1E**

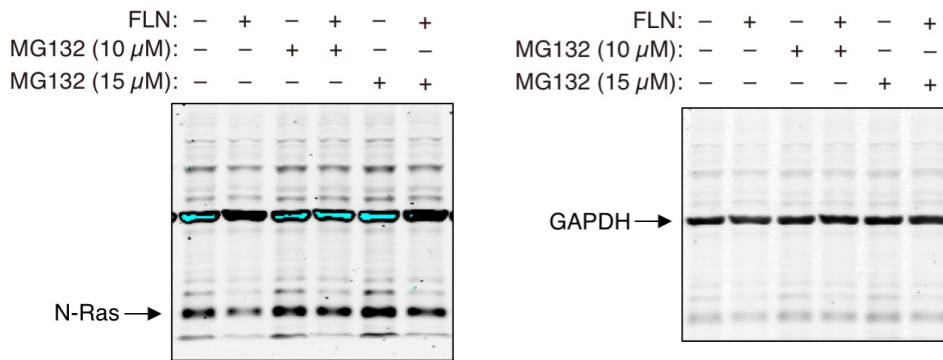

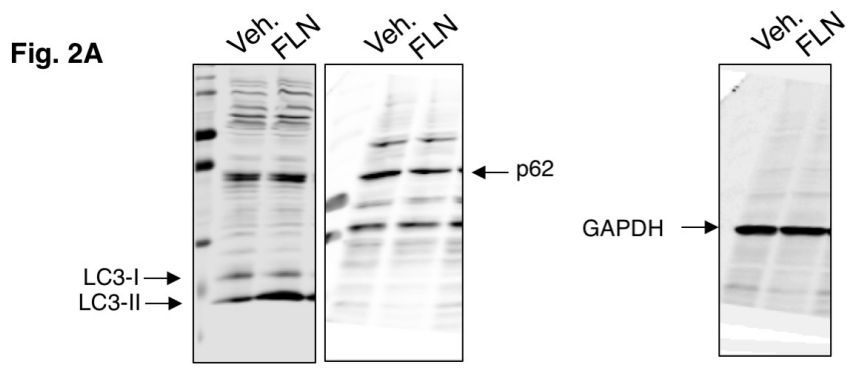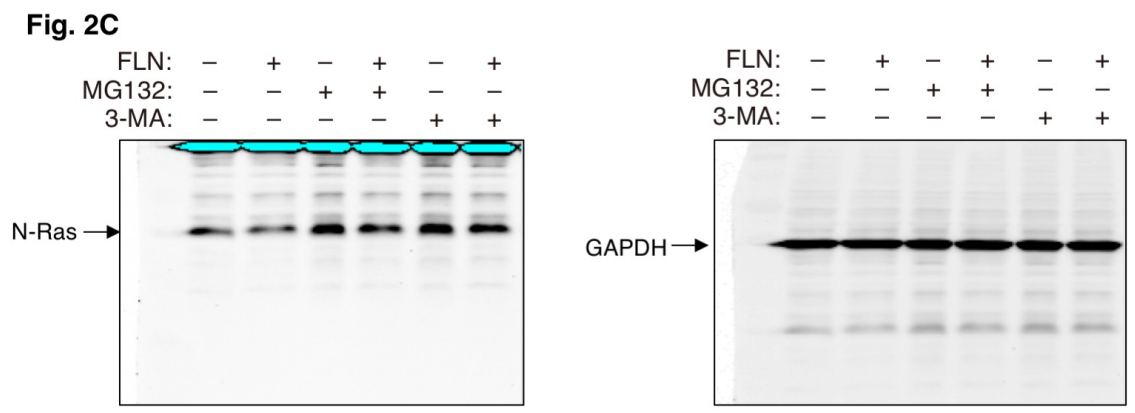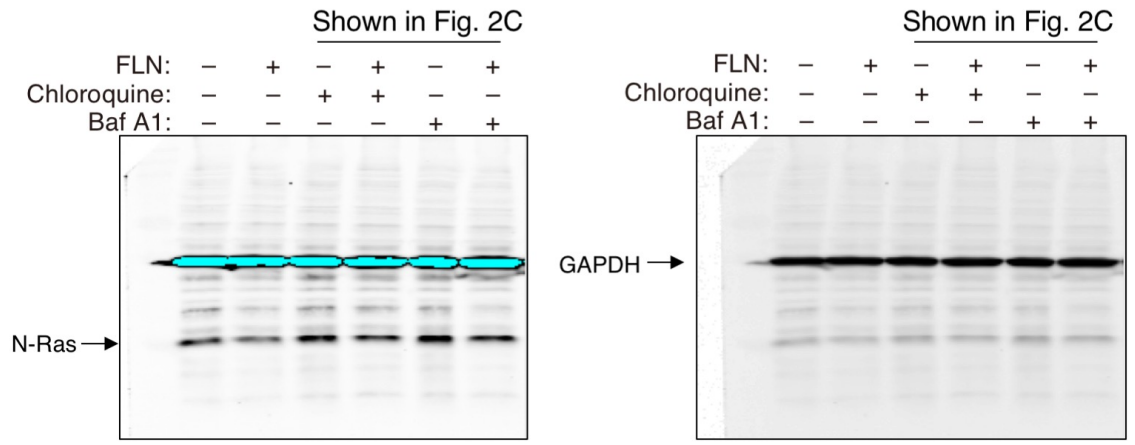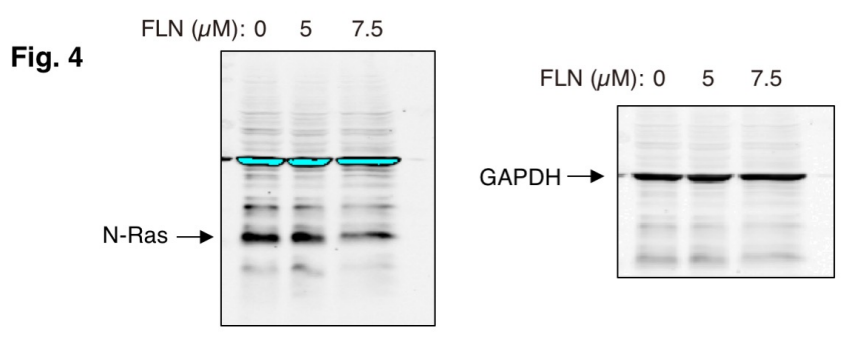

Supplement: 41598_2018_35237_MOESM1_ESM.pdf [file 41598_2018_35237_MOESM1_ESM.pdf]
